# Supplementary material for: Techno-economic study on reagents consumption during uranium leaching, a case study: Gattar pilot plant, Egypt
Source: Research Square preprint supplement (doi:10.21203/rs.3.rs-633396/v1), 2021-06-18
Supplement: Supplementary file 1 [file d933aca71a7f506c3528ea53.docx]

in case of liquid

in case of acid
